# Supplementary material for: Essential Oil Composition of Seven Bulgarian Hypericum Species and Its Potential as a Biopesticide
Source: MDPI journal article supplement (doi:10.3390/plants12040923), 2023-02-17
Supplement: s1 [file s1]

# SUPPLEMENTARY TABLES

Table S1. Essential oil composition of *Hypericum perforatum*

| Observed KI* | Adams KI | Compound Name                 | Min-Max (%) |
|--------------|----------|-------------------------------|-------------|
| -            | 865      | 2-methyloctane                | 10.79-10.96 |
| -            | 900      | nonane                        | 1.34-1.36   |
| 921          | 924      | $\alpha$ -thujene             | 0.27        |
| 929          | 932      | $\alpha$ -pinene              | 10.52-10.72 |
| 962          | 972      | 3-methylnonane                | 2.95-3.03   |
| 971          | 974      | $\beta$ -pinene               | 5.90-6.03   |
| 983          | 984      | myrcene                       | 0.46-0.47   |
| 1019         | 1020     | p-cymene                      | 0.57-0.58   |
| 1023         | 1024     | limonene                      | 0.44-0.45   |
| 1031         | 1032     | cis- $\beta$ -ocimene         | 0.41-0.43   |
| 1042         | 1044     | trans- $\beta$ -ocimene       | 0.79-0.81   |
| 1059         | 1061     | 2-methyldecane                | 1.03-1.07   |
| 1099         | 1100     | undecane                      | 0.88-0.98   |
| 1129         | -        | unknown, mw 126               | 0.55-0.59   |
| 1173         | 1174     | terpinen-4-ol                 | 0.28-0.29   |
| 1186         | 1186     | $\alpha$ -terpineol           | 0.29-0.30   |
| 1261         | 1261     | 2-methyldodecane              | 0.27-0.31   |
| 1371         | 1374     | $\alpha$ -copaene             | 0.30-0.31   |
| 1379         | 1387     | $\beta$ -bourbonene           | 0.33-0.37   |
| 1406         | 1411     | 2-epi- $\beta$ -funebrene     | 0.35-0.36   |
| 1415         | 1417     | trans- $\beta$ -caryophyllene | 15.78-16.21 |
| 1440         | -        | unknown, 204                  | 0.31-0.32   |
| 1450         | 1452     | $\alpha$ -humulene            | 0.75-0.89   |
| 1453         | 1454     | trans- $\beta$ -farnesene     | 1.85-1.86   |
| 1457         | 1458     | alloaromadendrene             | 0.34-0.49   |
| 1475         | 1478     | $\gamma$ -muurolene           | 1.36-1.39   |
| 1480         | 1480     | germacrene D                  | 5.37-5.47   |
| 1494         | -        | unknown, 204                  | 1.33-1.36   |
| 1500         | 1500     | $\alpha$ -muurolene           | 0.36-0.37   |
| 1512         | 1513     | $\gamma$ -cadinene            | 0.80-0.82   |
| 1521         | 1522     | $\delta$ -cadinene            | 1.49-1.53   |
| 1548         | -        | unknown, 220                  | 0.98-0.99   |
| 1557         | -        | unknown, 220                  | 0.16-0.34   |
| 1563         | -        | unknown, 204                  | 0.43-0.71   |
| 1573         | 1577     | spathulenol                   | 2.00-2.05   |
| 1577         | 1582     | caryophyllene oxide           | 15.70-16.11 |
| 1595         | 1602     | ledol                         | 1.26-1.27   |
| 1599         | -        | unknown, 220                  | 0.46-0.47   |
| 1627         | -        | unknown, 222                  | 0.76-0.78   |
| 1630         | -        | unknown, 220                  | 0.67-0.69   |
| 1636         | -        | unknown, 218                  | 0.87-0.92   |
| 1645         | -        | unknown, 222                  | 0.37-0.41   |
| 1650         | -        | unknown, 222                  | 0.85-0.93   |
| 1654         | -        | unknown, 220                  | 0.47-0.58   |
| 1671         | -        | unknown, 220                  | 1.00-1.05   |
| 1760         | -        | unknown                       | 0.58-0.72   |

|      |   |         |           |
|------|---|---------|-----------|
| 1839 | - | unknown | 0.37-0.39 |
| 1957 | - | unknown | 0.76-0.99 |
| 2094 | - | unknown | 0.40-0.43 |
| 2108 | - | unknown | 0.69-0.77 |
| 2292 | - | unknown | 0.33-0.36 |
| 2494 | - | unknown | 0.42-0.52 |

\* Kovats Index

Table S2. Essential oil composition of *Hypericum hirsutum*

| Observed KI* | Adams KI | Compound Name               | Min-Max (%) |
|--------------|----------|-----------------------------|-------------|
| -            | 900      | nonane                      | 47.04-48.3  |
| 962          | 972      | 3-methylnonane              | 0.51-0.52   |
| 993          | 1000     | decane                      | 0.84-0.85   |
| 1089         | 1087     | 2-nonanone                  | 0.41-0.45   |
| 1101         | 1100     | undecane                    | 18.36-18.67 |
| 1199         | 1201     | decanal                     | 0.27-0.29   |
| 1348         | 1350     | $\alpha$ -longipinene       | 2.46-2.53   |
| 1414         | 1417     | trans-caryophyllene         | 1.49-1.55   |
| 1431         | 1432     | $\alpha$ -trans-bergamotene | 0.39-0.42   |
| 1448         | -        | unknown, 204                | 6.75-7.05   |
| 1454         | 1454     | trans- $\beta$ -farnesene   | 1.76-1.94   |
| 1475         | 1478     | $\gamma$ -muurolene         | 1.10-1.15   |
| 1482         | 1481     | $\gamma$ -himachalene       | 1.97-2.12   |
| 1492         | 1496     | valencene                   | 0.65-0.68   |
| 1500         | -        | unknown, 204                | 0.33-0.35   |
| 1513         | 1513     | $\gamma$ -cadinene          | 0.44-0.48   |
| 1522         | 1522     | $\delta$ -cadinene          | 1.08-1.16   |
| 1561         | -        | unknown, 220                | 0.18-0.26   |
| 1572         | -        | unknown, 220                | 0.59-0.64   |
| 1576         | 1582     | caryophyllene oxide         | 2.98-3.13   |
| 1594         | 1600     | cedrol                      | 4.87-5.21   |
| 1643         | -        | unknown, 204                | 0.49-0.50   |
| 1651         | -        | unknown, 222                | 0.57-0.61   |
| 1682         | -        | unknown, 204                | 0.21-0.24   |
| 1761         | -        | unknown, 330                | 0.33-0.38   |
| 1958         | -        | unknown                     | 0.86-0.97   |
| 2078         | -        | unknown                     | 0.44-0.49   |
| 2096         | -        | unknown                     | 0.35-0.36   |
| 2293         | -        | unknown                     | 0.38-0.39   |

\* Kovats Index

Table S3. Essential oil composition of *Hypericum maculatum*

| Observed KI* | Adams KI | Compound Name             | Min-Max (%) |
|--------------|----------|---------------------------|-------------|
| -            | 865      | 2-methyloctane            | 2.28-2.31   |
| -            | 900      | nonane                    | 8.59-8.71   |
| 929          | 932      | $\alpha$ -pinene          | 6.59-6.67   |
| 962          | 972      | 3-methylnonane            | 1.64-1.66   |
| 967          | 969      | sabinene                  | 0.47        |
| 971          | 974      | $\beta$ -pinene           | 0.71-0.73   |
| 984          | 988      | myrcene                   | 0.32-0.33   |
| 1019         | 1020     | p-cymene                  | 0.18        |
| 1024         | 1024     | limonene                  | 0.26        |
| 1043         | 1044     | (E)- $\beta$ -ocimene     | 0.26        |
| 1100         | 1100     | undecane                  | 2.17-2.22   |
| 1106         | 1100     | nonanal                   | 0.36-0.37   |
| 1173         | 1174     | terpinen-4-ol             | 0.23        |
| 1347         | 1351     | $\alpha$ -cubebene        | 0.35-0.36   |
| 1371         | 1374     | $\alpha$ -copaene         | 0.87        |
| 1380         | 1384     | $\beta$ -bourbonene       | 0.99-1.00   |
| 1384         | 1390     | $\beta$ -cubebene         | 0.36-0.37   |
| 1403         | 1409     | $\alpha$ -gurjunene       | 0.98-1.00   |
| 1414         | 1417     | trans-caryophyllene       | 3.82-3.88   |
| 1424         | 1430     | $\beta$ -copaene          | 0.65-0.67   |
| 1441         | -        | unknown, 204              | 0.66-0.67   |
| 1450         | 1452     | $\alpha$ -humulene        | 0.57-0.74   |
| 1455         | 1454     | trans- $\beta$ -farnesene | 3.91-4.28   |
| 1458         | 1458     | alloaromadendrene         | 0.97-1.72   |
| 1477         | 1478     | $\gamma$ -muurolene       | 2.32-2.42   |
| 1483         | 1480     | germacrene D              | 26.61-27.0  |
| 1495         | -        | unknown, 204              | 1.15-1.18   |
| 1497         | 1500     | bicyclogermacrene         | 1.55-1.60   |
| 1500         | 1500     | $\alpha$ -muurolene       | 0.98-0.99   |
| 1513         | 1513     | $\gamma$ -cadinene        | 2.06-2.07   |
| 1522         | 1522     | $\delta$ -cadinene        | 5.85-5.93   |
| 1535         | 1537     | $\alpha$ -cadinene        | 0.41-0.42   |
| 1539         | 1544     | $\alpha$ -calacorene      | 0.26        |
| 1572         | 1577     | spathulenol               | 1.86-1.88   |
| 1576         | 1582     | caryophyllene oxide       | 2.31-2.36   |
| 1595         | 1602     | ledol                     | 3.54-3.62   |
| 1637         | 1638     | $\tau$ -cadinol           | 2.65-2.69   |
| 1642         | 1646     | $\alpha$ -muurolol        | 0.77-0.78   |
| 1651         | 1652     | $\alpha$ -cadinol         | 3.40-3.45   |
| 1761         | -        | unknown, 218              | 0.60-0.67   |
| 1896         | 1900     | nonadecane                | 0.40-0.41   |
| 1958         | -        | unknown                   | 0.84-0.90   |
| 2079         | -        | unknown                   | 1.41-1.48   |
| 2095         | -        | unknown                   | 0.40-0.42   |
| 2109         | -        | unknown                   | 0.46-0.50   |
| 2296         | -        | unknown                   | 0.32-0.33   |

\* Kovats Index

**Table S4.** Essential oil composition of *Hypericum montbretii*

| Observed KI* | Adams KI | Name                                   | Average (%) |
|--------------|----------|----------------------------------------|-------------|
| 901          | 900      | n-Nonane                               | 0.54-0.53   |
| 926          | 924      | $\alpha$ -Thujene                      | 0.07-0.09   |
| 935          | 932      | $\alpha$ -Pinene                       | 15.19-15.32 |
| 968          | 969      | Sabinene                               | 0.31-0.32   |
| 973          | 974      | $\beta$ -Pinene                        | 5.14-4.98   |
| 985          | 988      | $\beta$ -Myrcene                       | 3.05-3.37   |
| 1015         | 1014     | $\alpha$ -Terpinene                    | 0.15-0.16   |
| 1022         | 1020     | p-Cymene                               | 0.16-0.17   |
| 1025         | 1024     | D-Limonene                             | 2.6-2.62    |
| 1027         | 1026     | $\beta$ -Phellandrene                  | 0.07-0.09   |
| 1034         | 1032     | cis- $\beta$ -Ocimene                  | 5.64-5.73   |
| 1040         | 1044     | trans- $\beta$ -Ocimene                | 2.88-3.33   |
| 1055         | 1054     | $\gamma$ -Terpinene                    | 0.54-0.56   |
| 1066         | 1063     | n-Octanol                              | 0.21-0.22   |
| 1085         | 1086     | Terpinolene                            | 0.40-0.43   |
| 1101         | 1100     | n-Undecane                             | 3.80-4.59   |
| 1103         | 1102     | Nonanal                                | 0.76-0.81   |
| 1178         | 1174     | 1-Terpinen-4-ol                        | 0.39-0.42   |
| 1268         | 1271     | trans-2-decenol                        | 0.89-1.01   |
| 1347         | 1351     | $\alpha$ -Cubebene                     | 2.90-3.02   |
| 1373         | 1374     | $\alpha$ -Copaene                      | 0.28-0.37   |
| 1390         | 1388     | $\beta$ -Bourbonene                    | 0.27-0.29   |
| 1403         | 1399     | Dodecanal                              | 0.84-0.87   |
| 1419         | 1417     | $\beta$ -Caryophyllene                 | 3.99-4.20   |
| 1436         | 1439     | Aromadendrene                          | 0.41-0.43   |
| 1442         | 1440     | $\beta$ -Farnesene                     | 0.90-0.95   |
| 1453         | 1343     | $\alpha$ -Humullene                    | 0.45-0.48   |
| 1484         | 1481     | Germacrene D                           | 2.51-2.64   |
| 1502         | 1500     | $\alpha$ -Muurolene                    | 1.73-1.82   |
| 1510         | 1513     | $\gamma$ -Cadinene                     | 5.50-5.75   |
| 1521         | 1522     | $\delta$ -Cadinene                     | 4.40-4.63   |
| 1564         | 1561     | trans-Nerolidol                        | 4.67-5.03   |
| 1579         | 1577     | (-)-Spathulenol                        | 1.08-1.14   |
| 1580         | 1582     | Caryophyllene oxide                    | 1.22-1.29   |
| 1633         | 1630     | $\gamma$ -Eudesmol                     | 1.96-2.26   |
| 1637         | 1638     | tau.-Cadinol                           | 0.89-0.98   |
| 1642         | 1640     | tau.-Muurolol                          | 0.49-0.51   |
| 1647         | 1649     | $\alpha$ -Muurolol (Torreyol)          | 1.40-1.47   |
| 1650         | 1652     | $\alpha$ -Eudesmol                     | 1.60-1.69   |
| 1777         | 1779     | $\alpha$ -14-hydroxy-Muurolene         | 3.16-3.40   |
| 1871         | 1874     | 1-Hexadecanol                          | 0.42-0.43   |
| 1900         | 1900     | n-Nonadecane                           | 0.35-0.37   |
| 1955         | 1959     | n-Hexadecanoic acid                    | 4.86-4.96   |
| 2101         | 2100     | n-Heneicosane                          | 0.51-0.53   |
| 2122         | 2118     | 3,7,11,15-Tetramethyl-2-hexadecen-1-ol | 0.23-0.24   |
| 2144         | 2141     | (Z,Z,Z)-9,12, 15-octadecatrienoic acid | 1.85-1.92   |
| 2302         | 2300     | n-Tricosane                            | 0.20-0.21   |
| 2501         | 2500     | n-Pentacosane                          | 0.25-0.26   |
| 2803         | 2800     | n-Octacosane                           | 0.94-0.98   |

|      |              |           |
|------|--------------|-----------|
| 2900 | n-Nonacosane | 2.59-2.70 |
|------|--------------|-----------|

\* Kovats Index

**Table S5.** Essential oil composition of *Hypericum perforatum*, commercial from USA and Bulgaria

| Observed KI* | Adams KI | Compound Name (from USA)      | Min-Max (%) |
|--------------|----------|-------------------------------|-------------|
| -            | 865      | 2-methyloctane                | 40.86-41.00 |
| -            | 900      | nonane                        | 8.80-8.82   |
| 929          | 932      | $\alpha$ -pinene              | 13.73-13.75 |
| 942          | 946      | camphene                      | 0.13        |
| 963          | 972      | 3-methylnonane                | 11.30-11.37 |
| 971          | 975      | $\beta$ -pinene               | 2.27-2.28   |
| 983          | 1000     | 2-pentylfuran                 | 0.13-0.19   |
| 993          | 1000     | decane                        | 0.24        |
| 1019         | 1020     | p-cymene                      | 0.59        |
| 1023         | 1024     | limonene                      | 0.76-0.77   |
| 1060         | 1061     | 2-methyldecane                | 5.27-5.30   |
| 1087         | 1091     | p-cymenene                    | 0.21-0.22   |
| 1100         | 1100     | undecane                      | 6.21-6.26   |
| 1261         | 1261     | 2-methyldodecane              | 1.30-1.32   |
| 1299         | 1300     | tridecane                     | 0.60-0.61   |
| 1371         | 1374     | $\alpha$ -copaene             | 0.33        |
| 1406         | 1411     | 2-epi- $\beta$ -funebrene     | 0.35        |
| 1413         | 1417     | trans- $\beta$ -caryophyllene | 1.69-1.71   |
| 1474         | 1478     | $\gamma$ -muurolene           | 0.88-0.89   |
| 1499         | 1500     | $\alpha$ -muurolene           | 0.30-0.31   |
| 1512         | 1513     | $\gamma$ -cadinene            | 0.52-0.53   |
| 1521         | 1522     | trans-calamenene              | 0.44        |
| 1571         | 1577     | spathulenol                   | 0.23-0.28   |
| 1576         | 1582     | caryophyllene oxide           | 1.95-1.99   |
| 1837         | -        | unknown                       | 0.17-0.19   |
| 1895         | -        | unknown                       | 0.16-0.17   |
| 1956         | -        | unknown                       | 0.29        |

  

| Observed KI | Adams KI | Compound name (from Bulgaria) | Min-Max (%) |
|-------------|----------|-------------------------------|-------------|
| 743         | 745      | 4-methyl-2-Pentanol           | 0.26-0.27   |
| 861         | 865      | 2-Methyloctane                | 9.03-9.23   |
| 900         | 900      | n-Nonane                      | 1.61-1.97   |
| 926         | 924      | $\alpha$ -Thujene             | 0.55-0.57   |
| 935         | 932      | $\alpha$ -Pinene              | 8.63-8.77   |
| 947         | 946      | Camphene                      | 0.467-0.48  |
| 968         | 969      | Sabinene                      | 0.235       |
| 970         | 972      | 1-Octen-3-one                 | 1.86-2.40   |
| 973         | 974      | $\beta$ -Pinene               | 3.01-3.08   |
| 1004        | 1002     | $\alpha$ -Phellandrene        | 0.60-0.62   |
| 1015        | 1014     | $\alpha$ -Terpinene           | 0.31-0.32   |
| 1022        | 1020     | p-Cymene                      | 0.64-0.65   |
| 1023        | 1024     | D-Limonene                    | 3.35-3.83   |
| 1025        | 1026     | Eucalyptol                    | 0.39-0.40   |
| 1034        | 1032     | $\beta$ -cis-Ocimene          | 0.30        |

|      |      |                                |           |
|------|------|--------------------------------|-----------|
| 1040 | 1044 | $\beta$ -trans-Ocimene         | 0.35-0.36 |
| 1044 | 1049 | Isobutyl angelate              | 1.25-1.28 |
| 1055 | 1054 | $\gamma$ -Terpinene            | 0.70-0.72 |
| 1066 | 1063 | n-Octanol                      | 1.11-1.13 |
| 1085 | 1086 | Terpinolene                    | 0.35-0.36 |
| 1089 | 1087 | 2-Nonanone                     | 0.45-0.46 |
| 1096 | 1095 | $\beta$ -Linalool              | 2.08-2.50 |
| 1120 | 1123 | 2-Methylbutyl-2-methylbutyrate | 0.28      |
| 1141 | 1143 | Isoamyl angelate               | 0.11      |
| 1149 | 1148 | Isoamyl tiglate                | 1.10-1.08 |
| 1178 | 1174 | 1-Terpinen-4-ol                | 1.06-1.08 |
| 1199 | 1197 | (2Z)-Octenol acetate           | 0.59-0.61 |
| 1203 | 1201 | n-Decanal                      | 0.10-0.09 |
| 1226 | 1227 | Nerol                          | 1.45-1.48 |
| 1232 | 1231 | tetrahydro-Linalyl acetate     | 0.31-0.32 |
| 1247 | 1249 | 3-Methyl pentyl angelate       | 0.22-0.23 |
| 1291 | 1293 | 2-Undecanone                   | 0.25-0.24 |
| 1301 | 1300 | n-Tridecane                    | 0.07      |
| 1357 | 1359 | Neryl acetate                  | 8.93-9.47 |
| 1366 | 1365 | (2E)-Undecenol                 | 0.17      |
| 1373 | 1374 | $\alpha$ -Copaene              | 1.12-1.15 |
| 1400 | 1400 | n-Tetradecane                  | 0.18-0.19 |
| 1406 | 1405 | Italicene                      | 2.79-2.85 |
| 1409 | 1411 | $\alpha$ -cis-Bergamotene      | 0.61-0.62 |
| 1419 | 1417 | $\beta$ -Caryophyllene         | 2.39-2.45 |
| 1420 | 1421 | p-Cymen-7-ol acetate           | 1.61-1.64 |
| 1423 | 1422 | Linalool butanoate             | 0.14-0.15 |
| 1429 | 1430 | $\beta$ -Copaene               | 0.37-0.38 |
| 1436 | 1437 | $\alpha$ -Guaiene              | 2.72-2.97 |
| 1439 | 1440 | (Z)- $\beta$ -Farnesene        | 0.56-0.57 |
| 1444 | 1445 | (2Z,6E)-Dodecadien-1-al        | 0.29-0.30 |
| 1450 | 1449 | $\alpha$ -Himachalene          | 0.32-0.30 |
| 1470 | 1469 | n-Dodecanol                    | 0.51-0.52 |
| 1475 | 1474 | Undecanal. dimethyl acetal     | 0.58-0.59 |
| 1481 | 1479 | $\gamma$ -Curcumene            | 0.77-0.79 |
| 1502 | 1500 | $\beta$ -Himachalene           | 7.34-7.82 |
| 1513 | 1514 | $\beta$ -Curcumene             | 2.46-2.52 |
| 1524 | 1522 | $\delta$ -Cadinene             | 0.82-0.84 |
| 1539 | 1537 | $\alpha$ -Cadinene             | 1.05-1.40 |
| 1546 | 1544 | $\alpha$ -Calacorene           | 0.61-0.63 |
| 1550 | 1552 | cis-Cadinene ether             | 0.56-0.57 |
| 1556 | 1557 | trans-Cadinene ether           | 0.68-0.70 |
| 1560 | 1564 | $\beta$ -Calacorene            | 1.07-1.10 |
| 1575 | 1574 | Germacrene D-4-ol              | 0.53-0.54 |
| 1576 | 1575 | Pentyl salicylate              | 0.64-0.66 |
| 1578 | 1577 | (-)-Spathulenol                | 0.54-0.55 |
| 1580 | 1582 | Caryophyllene oxide            | 0.29-0.30 |
| 1592 | 1590 | Globulol                       | 1.80-1.96 |
| 1633 | 1630 | $\gamma$ -Eudesmol             | 2.39-2.45 |
| 1637 | 1638 | tau.-Cadinol                   | 0.21      |
| 1642 | 1640 | tau.-Muurolol                  | 1.34-1.36 |

|      |      |                                              |           |
|------|------|----------------------------------------------|-----------|
| 1647 | 1649 | $\beta$ -Eudesmol                            | 0.16      |
| 1650 | 1652 | $\alpha$ -Eudesmol                           | 2.11-2.16 |
| 1656 | 1655 | Geranyl valerate                             | 0.49      |
| 1665 | 1667 | (6Z)-Pentadecen-2-one                        | 0.25-0.26 |
| 1686 | 1685 | Germacra-4(15).5.10(14)-trien-1 $\alpha$ -ol | 0.19      |
| 1700 | 1700 | n-Heptadecane                                | 0.18      |
| 1720 | 1722 | (2Z.6E)-Farnesol                             | 0.13      |
| 1743 | 1740 | (2E.6E)-Farnesal                             | 0.10      |
| 1765 | 1767 | 14-oxy- $\alpha$ -Muurolene                  | 0.51-0.52 |
| 1778 | 1779 | 14-hydroxy- $\alpha$ -Muurolene              | 0.24-0.25 |
| 1784 | 1783 | (2E.6E)-Methyl farnesoate                    | 0.69-0.70 |
| 1791 | 1789 | 1-Octadecene                                 | 0.48      |

\* Kovats Index

Table S6. Essential oil composition of *Hypericum sp.* from second experiment

| Observed Adams |      | Name                         | HP1             | HP2             | Hcer            | HR               | Hcal. flos       | Hcal. leaves       |
|----------------|------|------------------------------|-----------------|-----------------|-----------------|------------------|------------------|--------------------|
| KI*            | KI   |                              | Aver $\pm$ SD   |                 |                 |                  |                  |                    |
| 900            | 900  | n-Nonane                     | 0.35 $\pm$ 0.02 | 0.50 $\pm$ 0.01 | nd              | 0.88 $\pm$ 0.01  | 5.33 $\pm$ 0.02  | 1.78 $\pm$ 0.01    |
| 926            | 924  | $\alpha$ -Thujene            | 0.13 $\pm$ 0.01 | 0.04 $\pm$      | nd              | nd               | nd               | nd                 |
| 929            | 926  | Ethyl 2-methyl pentanoate    | nd              | 0.57 $\pm$ 0.02 | 6.87 $\pm$ 0.01 | 3.39 $\pm$ 0.02  | 0.98 $\pm$ 0.01  | 0.70 $\pm$ 0.01    |
| 935            | 932  | $\alpha$ -Pinene             | 6.76 $\pm$ 0.30 | 6.41 $\pm$ 0.22 | nd              | 9.89 $\pm$ 0.38  | 23.86 $\pm$ 1.01 | 7.99 $\pm$ 0.46    |
| 947            | 946  | Camphene                     | nd              | nd              | nd              | 0.73 $\pm$ 0.02  | 0.36 $\pm$ 0.01  | 0.79 $\pm$ 0.02    |
| 968            | 969  | Sabinene                     | 0.44 $\pm$ 0.02 | 0.74 $\pm$ 0.02 | nd              | 0.95 $\pm$ 0.01  | 0.23 $\pm$ 0.01  | 0.13 $\pm$ 0.01    |
| 973            | 974  | $\beta$ -Pinene              | 3.04 $\pm$ 0.01 | 3.51 $\pm$ 0.01 | nd              | 16.43 $\pm$ 1.25 | 29.37 $\pm$ 2.01 | 720.62 $\pm$ 2.028 |
| 985            | 988  | $\beta$ -Myrcene             | 2.52 $\pm$ 0.02 | 3.00 $\pm$ 0.05 | nd              | 5.95 $\pm$ 0.78  | 6.48 $\pm$ 1.46  | 2.39 $\pm$ 0.65    |
| 1004           | 1002 | $\alpha$ -Phellandrene       | nd              | nd              | nd              | 2.93 $\pm$ 0.01  | 0.17 $\pm$ 0.01  | 0.15 $\pm$ 0.01    |
| 1015           | 1014 | $\alpha$ -Terpinene          | 0.15 $\pm$ 0.01 | 0.28 $\pm$ 0.02 | nd              | 1.91 $\pm$ 0.01  | 0.38 $\pm$ 0.01  | 0.65 $\pm$ 0.03    |
| 1022           | 1020 | p-Cymene                     | 0.18 $\pm$ 0.02 | 0.49 $\pm$ 0.03 | nd              | 0.99 $\pm$ 0.01  | 0.09 $\pm$ 0.00  | 0.10 $\pm$ 0.02    |
| 1023           | 1024 | D-Limonene                   | 0.22 $\pm$ 0.01 | 0.38 $\pm$ 0.02 | nd              | 3.75 $\pm$ 0.11  | 9.74 $\pm$ 1.01  | 14.44 $\pm$ 2.05   |
| 1028           | 1026 | $\beta$ -Phellandrene        | 0.12 $\pm$ 0.01 | 0.28 $\pm$ 0.01 | nd              | 1.40 $\pm$ 0.02  | 0.11 $\pm$ 0.02  | 0.46 $\pm$ 0.04    |
| 1034           | 1032 | cis- $\beta$ -Ocimene        | 0.45 $\pm$ 0.02 | 0.72 $\pm$ 0.01 | nd              | 8.69 $\pm$ 0.02  | 0.37 $\pm$ 0.02  | 3.92 $\pm$ 0.02    |
| 1040           | 1044 | trans- $\beta$ -Ocimene      | 5.28 $\pm$ 0.02 | 5.81 $\pm$ 0.02 | nd              | 12.88 $\pm$ 0.02 | 0.61 $\pm$ 0.01  | 0.65 $\pm$ 0.01    |
| 1055           | 1054 | $\gamma$ -Terpinene          | 0.35 $\pm$ 0.02 | 0.72 $\pm$ 0.01 | nd              | 3.31 $\pm$ 0.03  | 0.70 $\pm$ 0.02  | 1.21 $\pm$ 0.02    |
| 1066           | 1063 | n-Octanol                    | 0.64 $\pm$ 0.03 | 1.07 $\pm$ 0.03 | nd              | 0.15 $\pm$ 0.01  | 0.50 $\pm$ 0.02  | 0.14 $\pm$ 0.02    |
| 1085           | 1086 | Terpinolene                  | 0.09 $\pm$ 0.01 | 0.18 $\pm$ 0.02 | nd              | 1.20 $\pm$ 0.02  | 1.10 $\pm$ 0.03  | 1.25 $\pm$ 0.04    |
| 1102           | 1100 | n-Undecane                   | 0.38 $\pm$ 0.01 | 0.64 $\pm$ 0.02 | nd              | 1.33 $\pm$ 0.1   | nd               | nd                 |
| 1103           | 1102 | Nonanal                      | 0.09 $\pm$ 0.01 | 0.18 $\pm$ 0.02 | nd              | 0.45 $\pm$ 0.01  | nd               | nd                 |
| 1178           | 1174 | 1-Terpinen-4-ol              | 0.11 $\pm$ 0.01 | 0.16 $\pm$ 0.02 | nd              | 1.06 $\pm$ 0.01  | 0.08 $\pm$ 0.00  | 0.23 $\pm$ 0.01    |
| 1265           | 1268 | trans-2-decenol              | 0.13 $\pm$ 0.01 | 0.32 $\pm$ 0.02 | nd              | 0.16 $\pm$ 0.01  | 0.13 $\pm$ 0.02  | 0.16 $\pm$ 0.02    |
| 1270           | 1272 | (3Z)-Nonenal dimethyl acetal | nd              | nd              | nd              | 0.67 $\pm$ 0.02  | 0.53 $\pm$ 0.02  | 0.28 $\pm$ 0.02    |
| 1280           | 1277 | Nonanal dimethyl acetal      | nd              | nd              | nd              | 0.61 $\pm$ 0.02  | 0.63 $\pm$ 0.02  | 1.57 $\pm$ 0.23    |
| 1292           | 1289 | Thymol                       | nd              | nd              | 8.31 $\pm$ 1.32 | nd               | nd               | nd                 |
| 1347           | 1351 | $\alpha$ -Cubebene           | 0.25 $\pm$ 0.02 | 0.78 $\pm$ 0.02 | nd              | 1.41 $\pm$ 0.02  | 0.21 $\pm$ 0.02  | nd                 |
| 1351           | 1349 | Thymol acetate               | nd              | nd              | 4.77 $\pm$ 0.02 | nd               | nd               | nd                 |
| 1373           | 1374 | $\alpha$ -Copaene            | 0.20 $\pm$ 0.01 | 0.19 $\pm$ 0.01 | nd              | 0.25 $\pm$ 0.01  | 0.14 $\pm$ 0.01  | 0.32 $\pm$ 0.01    |
| 1390           | 1388 | $\beta$ -Bourbonene          | 0.66 $\pm$ 0.02 | 0.78 $\pm$ 0.02 | nd              | 0.08 $\pm$ 0.00  | 0.39 $\pm$ 0.02  | 0.59 $\pm$ 0.02    |

|      |      |                                        |            |            |            |           |           |           |
|------|------|----------------------------------------|------------|------------|------------|-----------|-----------|-----------|
| 1403 | 1399 | Dodecanal                              | 0.55±0.02  | 0.98±0.01  | nd         | 2.25±0.10 | 0.16±0.01 | 0.10±0.01 |
| 1419 | 1417 | β-Caryophyllene                        | 16.08±0.02 | 6.20±0.02  | nd         | 0.79±0.02 | 1.53±0.11 | 4.15±0.12 |
| 1436 | 1439 | Aromadendrene                          | 0.62±0.02  | 0.98±0.03  | nd         | 0.42±0.01 | 0.22±0.03 | 0.14±0.02 |
| 1442 | 1440 | β-Farnesene                            | 4.05±0.02  | 6.03±0.76  | nd         | 0.11±0.01 | 1.02±0.01 | 0.45±0.01 |
| 1453 | 1343 | α-Humullene                            | 1.80±0.01  | 1.68±0.01  | nd         | 0.14±0.01 | 0.16±0.01 | 6.70±0.84 |
| 1484 | 1481 | Germacrene D                           | 12.87±1.49 | 16.08±0.94 | nd         | 3.82±0.23 | 6.50±0.47 | 8.84±0.57 |
| 1502 | 1500 | α-Muurolene                            | 2.28±0.02  | 2.62±0.054 | nd         | 0.57±0.05 | 0.40±0.02 | 3.13±0.12 |
| 1510 | 1513 | γ-Cadinene                             | 3.72±0.21  | 3.13±0.41  | nd         | 0.35±0.02 | 2.19±0.02 | 0.54±0.03 |
| 1521 | 1522 | δ-Cadinene                             | 3.51±0.16  | 3.54±0.03  | nd         | 0.15±0.03 | 0.96±0.02 | 1.55±0.02 |
| 1550 | 1553 | Thymohydroquinone                      | nd         | nd         | 3.63±0.12  | nd        | nd        | 0.31±0.02 |
| 1564 | 1561 | trans-Nerolidol                        | 2.25±0.01  | 3.45±0.01  | nd         | 0.72±0.01 | 0.15±0.02 | 0.19±0.02 |
| 1579 | 1577 | (-)-Spathulenol                        | 3.95±0.01  | 3.50±0.1   | nd         | 0.10±0.01 | 0.17±0.01 | 0.32±0.01 |
| 1580 | 1582 | Caryophyllene oxide                    | 5.12±0.13  | 3.35±0.01  | nd         | 0.16±0.01 | 0.16±0.01 | 0.40±0.01 |
| 1633 | 1630 | γ-Eudesmol                             | 0.95±0.02  | 0.87±0.01  | nd         | 0.09±0.00 | 0.12±0.00 | 0.40±0.02 |
| 1637 | 1638 | tau.-Cadinol                           | 2.03±0.01  | 3.36±0.01  | nd         | 0.36±0.01 | 0.44±0.02 | 1.60±0.10 |
| 1642 | 1640 | tau.-Muurolol                          | 1.97±0.02  | 4.45±0.12  | nd         | 0.48±0.01 | 0.13±0.01 | 0.64±0.01 |
| 1647 | 1649 | α-Muurolol (Torreyol)                  | 2.96±0.02  | 2.71±0.03  | nd         | 0.47±0.01 | 0.56±0.02 | 5.66±0.42 |
| 1650 | 1652 | α-Eudesmol                             | 2.31±0.02  | 2.62±0.03  | nd         | 0.11±0.01 | 0.22±0.02 | 0.16±0.01 |
| 1777 | 1779 | α-14-hydroxy-Muurolene                 | 2.30±0.14  | 2.40±0.01  | nd         | 1.29±0.05 | 0.12±0.02 | 0.98±0.03 |
| 1871 | 1874 | 1-Hexadecanol                          | 0.23±0.02  | 0.26±0.01  | nd         | 0.23±0.01 | 0.12±0.01 | nd        |
| 1900 | 1900 | n-Nonadecane                           | 0.19±0.01  | 0.27±0.02  | nd         | 0.50±0.02 | 0.28±0.02 | 0.36±0.01 |
| 1955 | 1959 | n-Hexadecanoic acid                    | 2.51±0.04  | 0.67±0.02  | 36.48±1.45 | nd        | nd        | nd        |
| 2101 | 2100 | n-Heneicosane                          | 0.28±0.02  | 0.10±0.01  | 0.13±0.01  | 0.22±0.02 | 0.35±0.01 | 0.37±0.02 |
| 2122 | 2118 | 3,7,11,15-Tetramethyl-2-hexadecen-1-ol | 0.13±0.01  | 0.19±      | 28.49±0.02 | 0.09±0.02 | 0.12±     | nd        |
| 2135 | 2132 | (Z,Z)-9,12-octadecadienoic acid        | nd         | nd         | 3.45±0.02  | nd        | nd        | nd        |
| 2144 | 2141 | (Z,Z,Z)-9,12, 15-octadecatrienoic acid | 0.85±0.02  | 0.12±0.01  | 4.03±0.01  | nd        | nd        | nd        |
| 2302 | 2300 | n-Tricosane                            | 0.11±0.01  | 0.09±0.00  | 2.47±0.03  | 0.25±0.01 | 0.16±0.01 | 0.18±0.01 |
| 2501 | 2500 | n-Pentacosane                          | 0.14±0.01  | 0.18±0.02  | nd         | 0.18±0.01 | 0.45±0.02 | 0.14±0.01 |
| 2803 | 2800 | n-Octacosane                           | 0.52±0.02  | 0.19±0.01  | nd         | 0.68±0.02 | 0.20±0.01 | 0.17±0.02 |
| 2900 | 2900 | n-Nonacosane                           | 1.42±0.03  | 0.48±0.02  | nd         | 2.45±0.02 | 0.25±0.01 | 0.20±0.01 |

\* Kovats Index
